# Supplementary material
Source: HighWire-hosted journal article supplement (https://drc.bmj.com/content/11/3/e003282)
Supplement: inline-supplementary-material-1 [file inline-supplementary-material-1.pdf]

**Supplementary Table1 The source of flow cytometry antibodies**

| Name                            | Cat.    | Com.          |
|---------------------------------|---------|---------------|
| <b>CD16/32</b>                  | B348271 | Biolegend, US |
| <b>APC-CD45</b>                 | B327330 | Biolegend, US |
| <b>FITC-CD<sup>3</sup></b>      | B336474 | Biolegend, US |
| <b>PE-CD<sup>4</sup></b>        | B334827 | Biolegend, US |
| <b>PE-cy7-Ly6C</b>              | B352990 | Biolegend, US |
| <b>APC-cy7-CD<sup>11b</sup></b> | B342456 | Biolegend, US |
| <b>Percp-CD<sup>8</sup></b>     | B310055 | Biolegend, US |

**Supplementary Table2 The primer nucleotide sequences for qRT-PCR Gene**

| Name                          | REV                             | FW                                   |
|-------------------------------|---------------------------------|--------------------------------------|
| <b>IL-1<math>\beta</math></b> | 5'- TGAGTGATACTGCCTGCCTG-3'     | 5'-TCTTTGAAGTTGACGGACCC-3'           |
| <b>IL-6</b>                   | 5'-CACGATTTCCCAGAGAACATGTG-3'   | 5'-ACAACCACGGCCTTCCCTACTT-3'         |
| <b>IL-10</b>                  | 5'-CCAGTTTTACCTGGTAGAAGTGATG-3' | 5'-TGTCTAGGTCCTGGAGTCCAGCAGACTCAA-3' |
| <b>TNF-a</b>                  | 5'-GTGAGGGTCTGGGCCATAGA-3'      | 5'-GAAGTTCCCAAATGGCCTCC-3'           |

**Supplementary Table3-1 The criteria of pathological score for pancreatic samples**

| Score | Inflammation             | Steatosis + Interstitial hyperplasia | hyaline degeneration | Vascular damage  |
|-------|--------------------------|--------------------------------------|----------------------|------------------|
| 0     | <6 inflammatory cells    | normal                               | normal               | normal           |
| 1     | 6-10 inflammatory cells  | 10-30%                               | 10-30%               | mild hyperemia   |
| 2     | 10-20 inflammatory cells | 30-50%                               | 30-50%               | severe hyperemia |
| 3     | 20-30                    | 50-70%                               | 50-70%               | necrosis         |
| 4     | >30                      | 70-90%                               | 70-90%               | \                |

**Supplementary Table3-2 The criteria of pathological score for intestinal samples**

| Score | Crypt damage                        | Inflammation                                    | Mucosal villi                                                                                                            |
|-------|-------------------------------------|-------------------------------------------------|--------------------------------------------------------------------------------------------------------------------------|
| 0     | normal                              | absent                                          | normal                                                                                                                   |
| 1     | Irregular crypts                    | mucosal                                         | Subepithelial Gruenhagen's space; capillary congestion                                                                   |
| 2     | mild to moderate crypt loss(10-50%) | submucosal                                      | Extension of the subepithelial space with moderate lifting of epithelial layer from the lamina propria.                  |
| 3     | Severe (50-90%)                     | Transmural extending into muscularis and serosa | Massive epithelial lifting down the sides of villi. A few tips may be denuded.                                           |
| 4     | complete                            | diffuse                                         | Denuded villi with lamina propria and dilated capillaries exposed. Increased cellularity of lamina propria may be noted. |
